# Supplementary material
Source: PubMed Central journal article supplement (PMC7530064)
Supplement: NIHMS1619702-supplement-10456_2020_9740_MOESM1_ESM.pdf [file NIHMS1619702-supplement-10456_2020_9740_MOESM1_ESM.pdf]

a Endothelial phenotypes of CECs

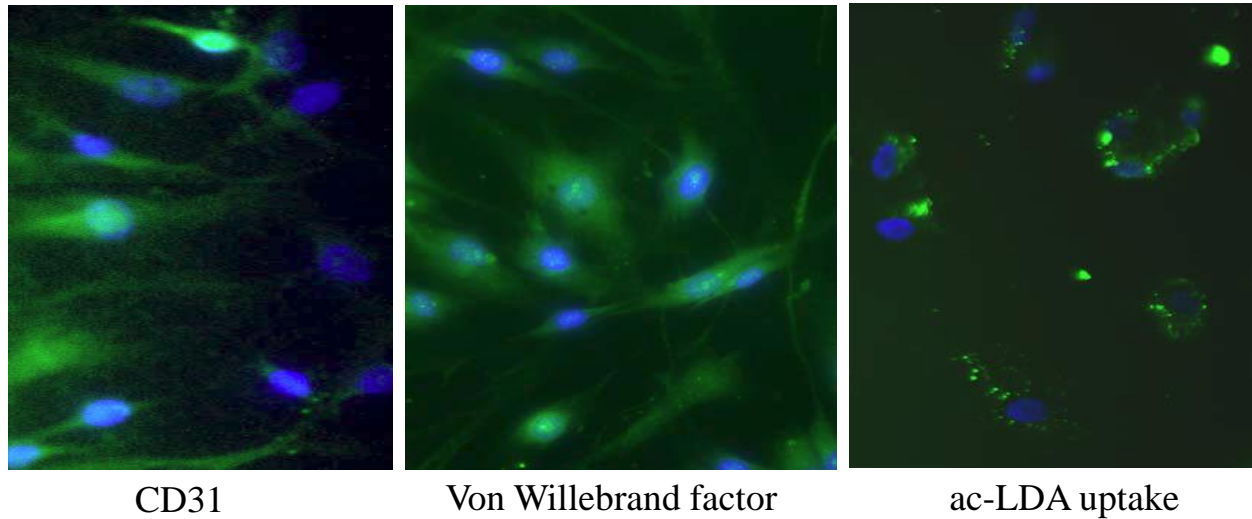

b IQGAP1 knockdown in CECs

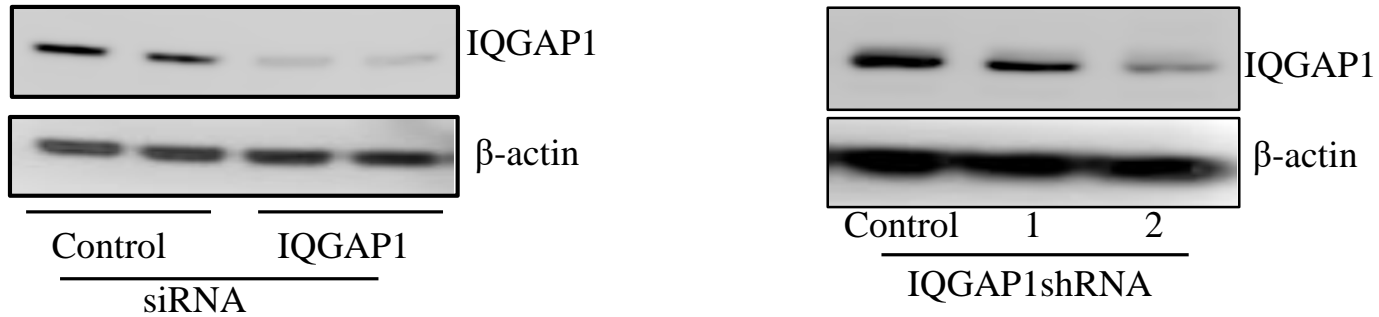

**Supplemental Figure 1.** a. Immunostaining of endothelial cell markers, CD31, Von Willebrand factor, and ac-LDK uptake; b. Western blots of IQGAP1 in CECs transfected with Control siRNA or IQGAP1 siRNA or transduced with adenovirus-delivered shRNA (control, IQGAP1shRNA1 or IQGAP1shRNA2). IQGAP1shRNA2 was used in tube formation assay.

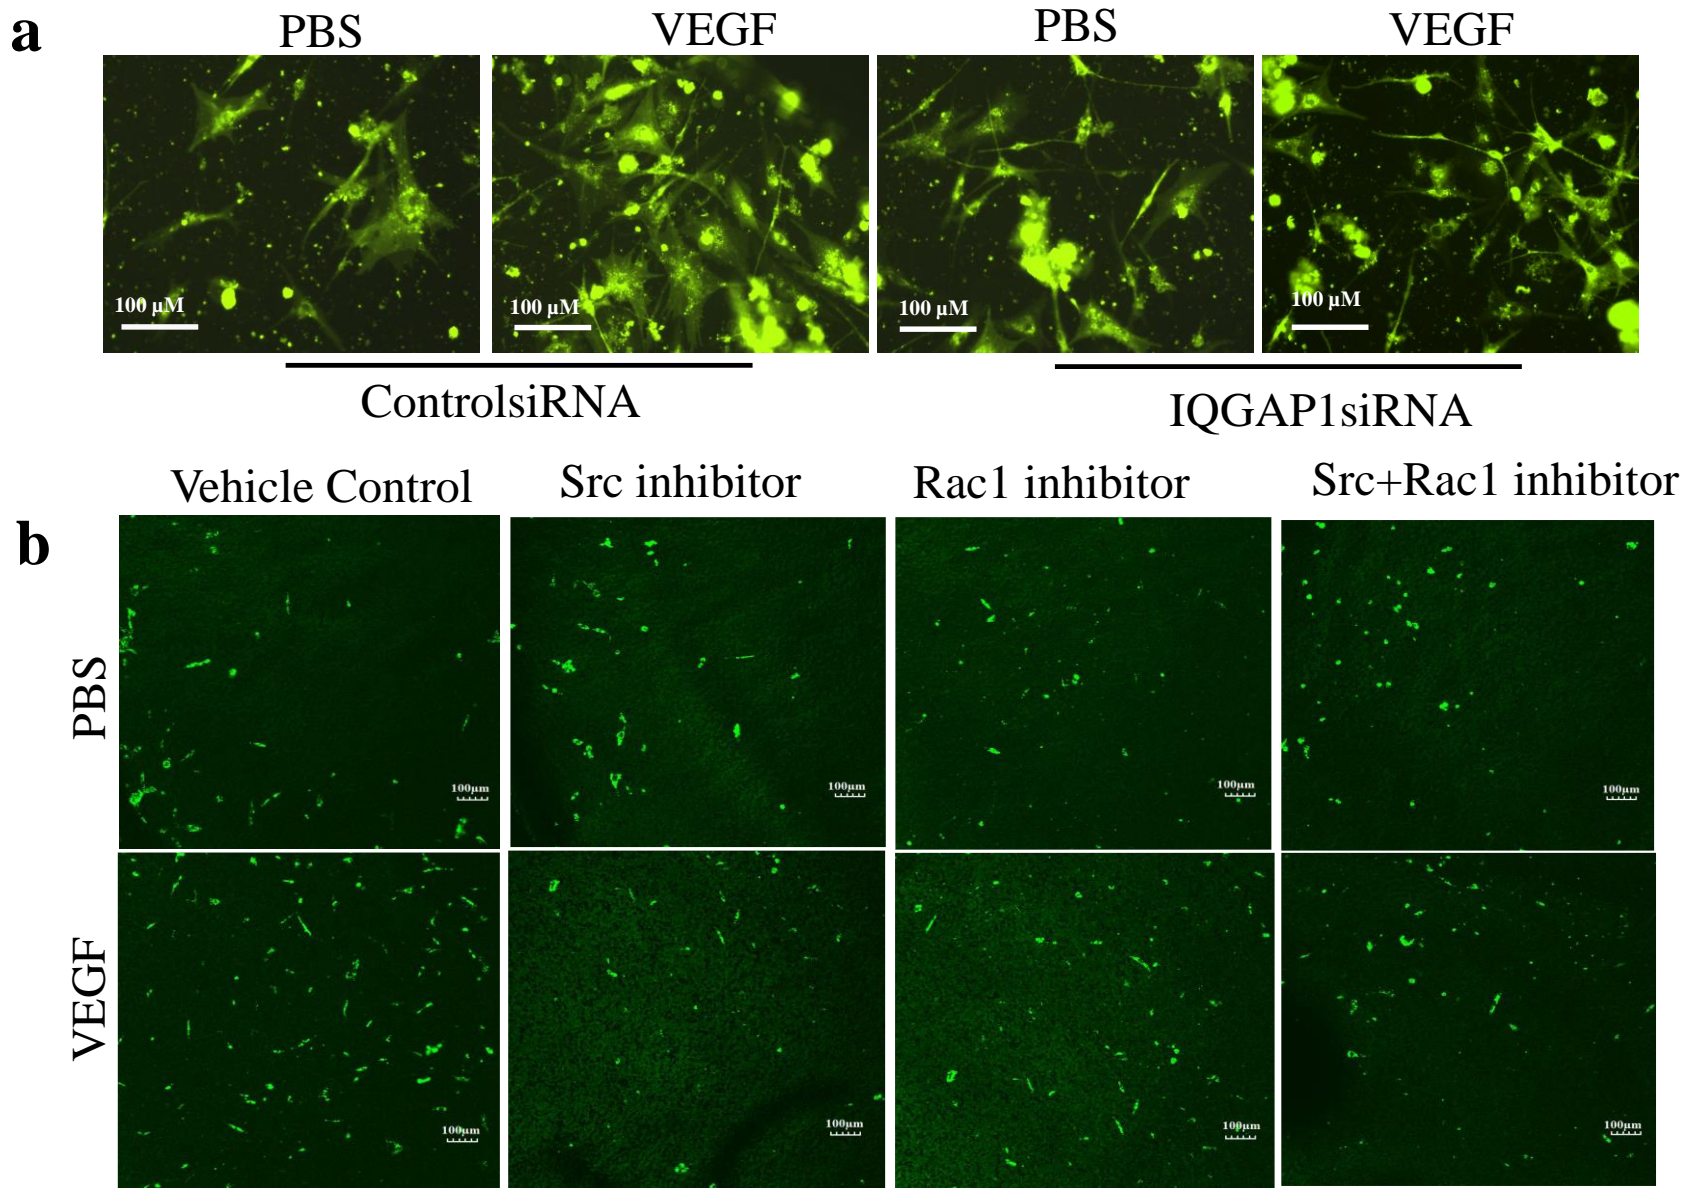

**Supplemental Figure 2.** a. Representative images taken by fluorescent microscope of CEC migration shown in Fig. 5e, and b. Representative images taken by confocal microscope of CEC migration shown in Fig. 8a.

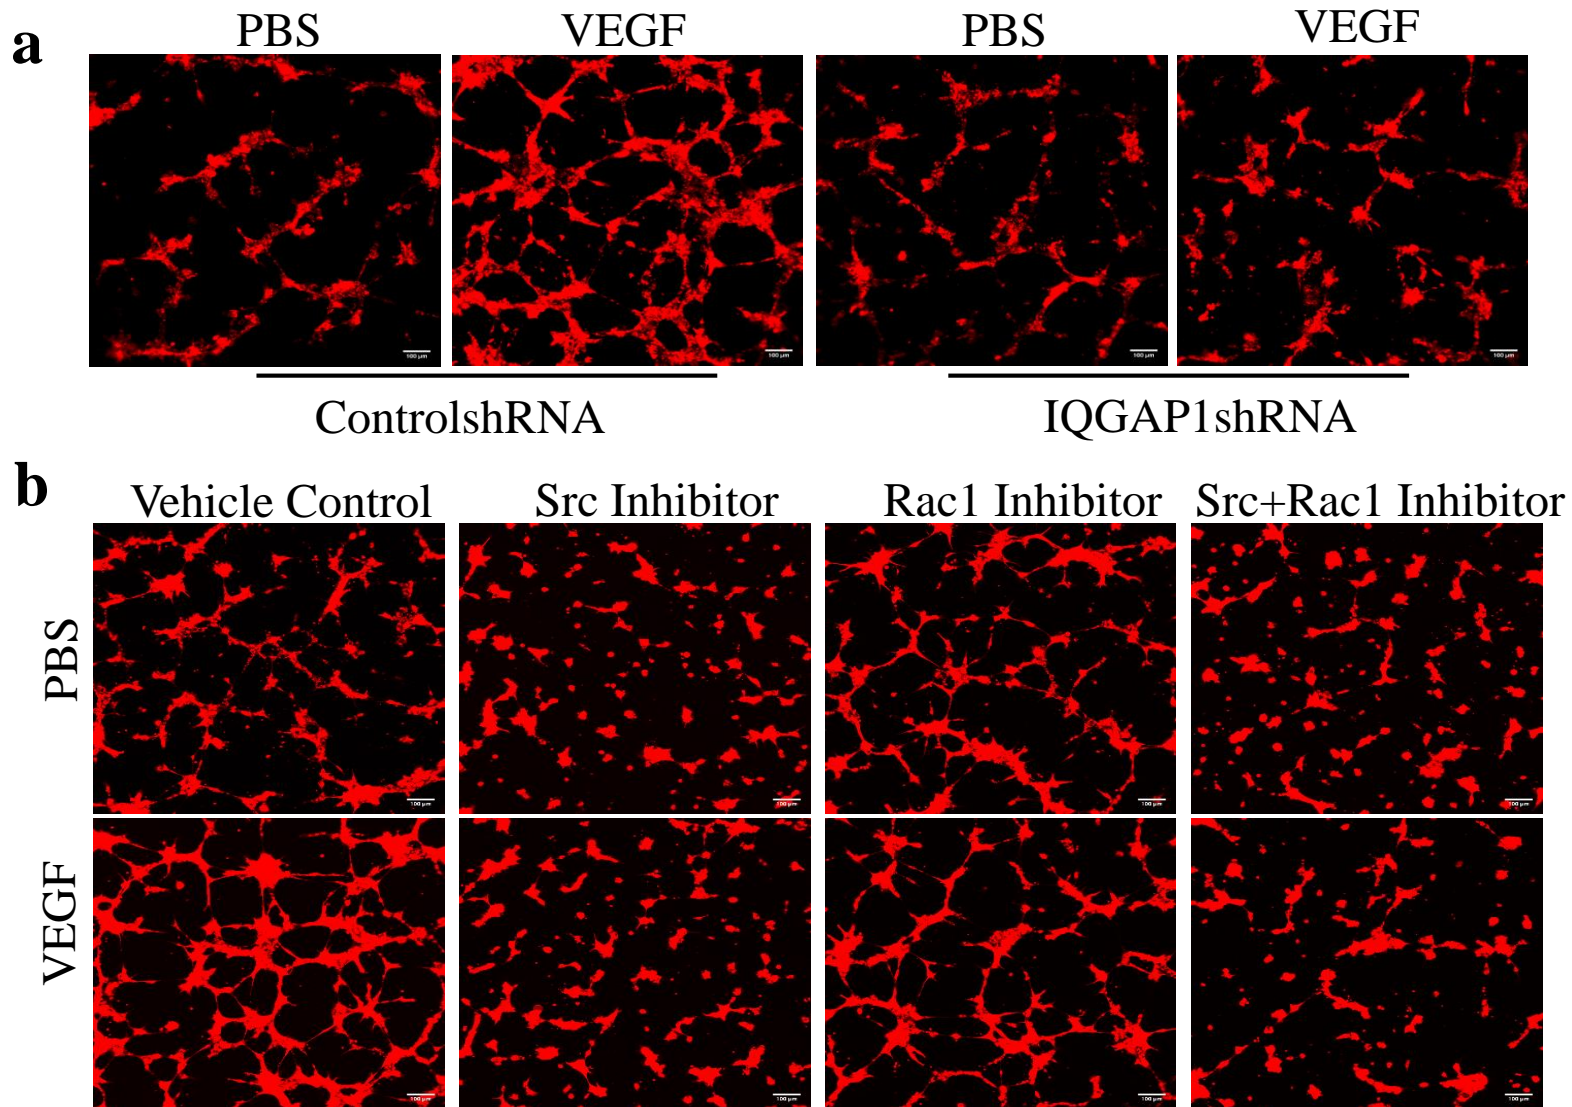

**Supplemental Figure 3.** a. Representative images taken by confocal microscope of tube formation assays shown in Fig. 5f, and b. Representative images of tube formation shown in Fig. 8b.
